# Supplementary material for: OCT-Based Biomarkers are Associated with Systemic Inflammation in Patients with Treatment-Naïve Diabetic Macular Edema
Source: PubMed Central journal article supplement — Ophthalmol Ther. 2022 Sep 27;11(6):2153–67. doi: 10.1007/s40123-022-00576-x (PMC9587150; doi:10.1007/s40123-022-00576-x), 2022-09-27
Supplement: 40123_2022_576_MOESM1_ESM.pdf [file 40123_2022_576_MOESM1_ESM.pdf]

## **Title Page**

# **OCT-based biomarkers are associated with systemic inflammation in patients with treatment-naïve diabetic macular edema**

Jingxin Zhou<sup>1</sup>, Siyuan Song<sup>1</sup>, Yi Zhang<sup>2</sup>, Kai Jin<sup>1\*</sup>, and Juan Ye<sup>1\*</sup>

<sup>1</sup> Department of Ophthalmology, the Second Affiliated Hospital of Zhejiang University, School of Medicine, Hangzhou 310009, China.

<sup>2</sup> Department of Ophthalmology, the First Affiliated Hospital of Zhejiang Chinese Medical University, Zhejiang Provincial Hospital of Traditional Chinese Medicine, Hangzhou 310009, China.

\*Corresponding Author: Juan Ye (yejuan@zju.edu.cn), Kai Jin (jinkai@zju.edu.cn).

## Supplementary material

### Supplementary material

Table S1 Comparison of clinical characteristics between subjects with different IRC size.

|                     | Cyst size     |                 |               | P value      |
|---------------------|---------------|-----------------|---------------|--------------|
|                     | Mild (n=17)   | Moderate (n=37) | Severe (n=28) |              |
| Age (years)         | 64.94±9.70    | 63.35±9.38      | 57.58±11.78   | <b>0.034</b> |
| DM Duration (years) | 10.06±4.47    | 11.32±4.54      | 12.00±4.22    | 0.364        |
| BCVA (mean ± SD)    | 0.20±0.22     | 0.28±0.20       | 0.42±0.27     | <b>0.008</b> |
| DR severity (n)     |               |                 |               | 0.169        |
| Mild NPDR           | 5             | 5               | 2             |              |
| Moderate NPDR       | 5             | 7               | 10            |              |
| Severe NPDR         | 2             | 5               | 17            |              |
| PDR                 | 5             | 10              | 9             |              |
| SII                 | 467.27±181.66 | 543.19±303.66   | 610.79±238.96 | 0.092        |
| NLR                 | 2.42±0.79     | 2.76±1.24       | 2.93±1.13     | 0.331        |
| PLR                 | 115.55±42.00  | 128.89±52.80    | 135.23±37.55  | 0.256        |

Table S2 Comparison of clinical characteristics between subjects with different ELM/EZ integrity.

|                     | ELM/EZ integrity |                  |               | P value          |
|---------------------|------------------|------------------|---------------|------------------|
|                     | Intact (n=33)    | Disrupted (n=42) | Absent (n=7)  |                  |
| Age (years)         | 61.63±10.36      | 61.88±10.43      | 61.06±14.55   | 0.981            |
| DM Duration (years) | 11.12±4.07       | 11.64±4.67       | 10.00±4.76    | 0.639            |
| DR severity (n)     |                  |                  |               | 0.947            |
| Mild NPDR           | 5                | 7                | 0             |                  |
| Moderate NPDR       | 9                | 11               | 2             |                  |
| Severe NPDR         | 9                | 12               | 3             |                  |
| PDR                 | 10               | 12               | 2             |                  |
| BCVA (mean ± SD)    | 0.05±0.04        | 0.33±0.21        | 0.20±0.23     | <b>&lt;0.001</b> |
| SII                 | 515.42±257.54    | 565.57±255.56    | 654.44±322.08 | 0.476            |
| NLR                 | 2.68±1.14        | 2.74±1.12        | 3.12±1.18     | 0.660            |
| PLR                 | 125.18±44.34     | 127.61±46.40     | 147.01±52.92  | 0.622            |

## Supplementary material

Table S3 Comparison of clinical characteristics between subjects with different DRIL presence.

|                     | DRIL            |                  | P value          |
|---------------------|-----------------|------------------|------------------|
|                     | Intact (n=70)   | Disrupted (n=12) |                  |
| Age (years)         | 61.43 ± 10.81   | 63.35 ± 9.83     | 0.567            |
| DM Duration (years) | 11.13 ± 4.32    | 12.17 ± 5.06     | 0.461            |
| DR severity (n)     |                 |                  | 0.704            |
| Mild NPDR           | 10              | 2                |                  |
| Moderate NPDR       | 20              | 2                |                  |
| Severe NPDR         | 19              | 5                |                  |
| PDR                 | 21              | 3                |                  |
| BCVA                | 0.08 ± 0.07     | 0.32 ± 0.23      | <b>&lt;0.001</b> |
| SII                 | 557.08 ± 272.87 | 528.98 ± 191.17  | 0.963            |
| NLR                 | 2.77 ± 1.19     | 2.58 ± 0.62      | 0.911            |
| PLR                 | 128.21 ± 46.02  | 128.78 ± 47.32   | 0.985            |

Table S4 Comparison of clinical characteristics between subjects with different HRF number quartile.

|                     | Hyperreflective foci |                      |                      |                      | P value          |
|---------------------|----------------------|----------------------|----------------------|----------------------|------------------|
|                     | Quartile 1<br>(n=20) | Quartile 2<br>(n=21) | Quartile 3<br>(n=21) | Quartile 4<br>(n=20) |                  |
| Age (years)         | 62.49 ± 8.51         | 61.97 ± 14.28        | 58.32 ± 8.53         | 64.22 ± 9.92         | 0.343            |
| DM Duration (years) | 11.40 ± 3.79         | 10.57 ± 4.12         | 9.52 ± 3.87          | 13.80 ± 4.95         | <b>0.013</b>     |
| DR severity (n)     |                      |                      |                      |                      | <b>&lt;0.001</b> |
| Mild NPDR           | 6                    | 4                    | 2                    | 0                    |                  |
| Moderate NPDR       | 10                   | 5                    | 5                    | 2                    |                  |
| Severe NPDR         | 2                    | 10                   | 8                    | 4                    |                  |
| PDR                 | 2                    | 2                    | 6                    | 14                   |                  |
| BCVA                | 0.21 ± 0.17          | 0.31 ± 0.26          | 0.31 ± 0.24          | 0.30 ± 0.25          | 0.388            |
| SII                 | 430.57 ± 120.82      | 482.78 ± 175.16      | 533.18 ± 247.38      | 769.85 ± 330.94      | <b>0.001</b>     |
| NLR                 | 2.38 ± 0.75          | 2.4949 ± 0.78        | 2.56 ± 1.17          | 3.57 ± 1.33          | <b>0.003</b>     |
| PLR                 | 115.95 ± 45.69       | 109.64 ± 35.77       | 122.94 ± 36.05       | 165.84 ± 46.10       | <b>&lt;0.001</b> |

## Supplementary material

Table S5 Comparison of clinical characteristics between subjects with different SRF presence.

|                     | Subretinal fluid |                 | P value      |
|---------------------|------------------|-----------------|--------------|
|                     | Absent (n=51)    | Present (n=31)  |              |
| Age (years)         | 63.81 ± 10.32    | 58.27 ± 10.40   | <b>0.021</b> |
| DM Duration (years) | 11.24 ± 4.26     | 11.39 ± 4.72    | 0.881        |
| DR severity (n)     |                  |                 | 0.102        |
| Mild NPDR           | 10               | 2               |              |
| Moderate NPDR       | 16               | 6               |              |
| Severe NPDR         | 14               | 10              |              |
| PDR                 | 11               | 13              |              |
| BCVA                | 0.24 ± 0.21      | 0.31 ± 0.24     | 0.164        |
| SII                 | 501.73 ± 205.54  | 637.27 ± 320.49 | <b>0.022</b> |
| NLR                 | 2.59 ± 0.93      | 3.00 ± 1.37     | 0.203        |
| PLR                 | 118.86 ± 42.37   | 143.80 ± 47.96  | <b>0.021</b> |

Table S6 Comparison of clinical characteristics between subjects with different vitreomacular condition.

|                  | Vitreomacular condition |                 |                 |                 |                 | P value |
|------------------|-------------------------|-----------------|-----------------|-----------------|-----------------|---------|
|                  | No adhesion (n=32)      | IVD (n=23)      | CVD (n=5)       | VMT (n=5)       | ERM (n=17)      |         |
| Age (years)      | 62.05 ± 11.00           | 58.42 ± 9.93    | 57.26 ± 9.07    | 63.34 ± 9.28    | 66.35 ± 10.71   | 0.165   |
| Duration (years) | 11.63 ± 4.53            | 11.04 ± 4.26    | 11.40 ± 3.65    | 11.60 ± 4.34    | 10.88 ± 5.05    | 0.981   |
| DR severity (n)  |                         |                 |                 |                 |                 | 0.975   |
| Mild NPDR        | 6                       | 2               | 0               | 1               | 3               |         |
| Moderate NPDR    | 8                       | 7               | 3               | 0               | 4               |         |
| Severe NPDR      | 9                       | 6               | 2               | 2               | 5               |         |
| PDR              | 9                       | 8               | 0               | 2               | 5               |         |
| BCVA             | 0.17 ± 0.18             | 0.28 ± 0.19     | 0.41 ± 0.36     | 0.27 ± 0.22     | 0.32 ± 0.24     | 0.063   |
| SII              | 537.20 ± 218.86         | 565.99 ± 303.21 | 522.22 ± 236.39 | 570.38 ± 191.35 | 568.96 ± 320.93 | 0.990   |
| NLR              | 2.69 ± 0.94             | 2.73 ± 1.28     | 2.61 ± 1.69     | 2.63 ± 0.33     | 2.95 ± 1.27     | 0.835   |
| PLR              | 127.56 ± 46.29          | 123.91 ± 35.57  | 121.97 ± 33.30  | 132.87 ± 52.00  | 136.10 ± 0.96   | 0.996   |

## Supplementary material

Table S7. Subgroup analysis result based on SRF presence.

|             | HRF (SRF absence)      |              |                        |              | HRF (SRF presence)     |              |                        |              |
|-------------|------------------------|--------------|------------------------|--------------|------------------------|--------------|------------------------|--------------|
|             | Univariable            |              | Multivariable          |              | Univariable            |              | Multivariable          |              |
|             | $\beta$<br>coefficient | P<br>value   | $\beta$<br>coefficient | P<br>value   | $\beta$<br>coefficient | P<br>value   | $\beta$<br>coefficient | P<br>value   |
| Age         | 0.152                  | 0.286        | /                      | /            | 0.229                  | 0.215        | /                      | /            |
| DM Duration | 0.181                  | 0.203        | /                      | /            | 0.443                  | <b>0.012</b> | 0.365                  | <b>0.015</b> |
| DR Severity | 0.492                  | <b>0.001</b> | 0.376                  | <b>0.005</b> | 0.461                  | <b>0.009</b> | 0.172                  | 0.288        |
| BCVA        | 0.104                  | 0.472        | /                      | /            | 0.140                  | 0.452        | /                      | /            |
| Cyst Size   | 0.261                  | 0.795        | /                      | /            | 0.272                  | 0.787        | /                      | /            |
| ELM/EZ      | 0.314                  | <b>0.025</b> | 0.256                  | 0.057        | 0.246                  | 0.181        | /                      | /            |
| DRIL        | -0.195                 | 0.846        | /                      | /            | 0.026                  | 0.890        | /                      | /            |
| HRF         | /                      | /            | /                      | /            | /                      | /            | /                      | /            |
| SRF         | /                      | /            | /                      | /            | /                      | /            | /                      | /            |
| VM          | -0.064                 | 0.658        | /                      | /            | 0.231                  | 0.212        | /                      | /            |
| SII (ln)    | 0.372                  | <b>0.007</b> | 0.372                  | <b>0.007</b> | 0.505                  | <b>0.004</b> | 0.520                  | <b>0.001</b> |
| NLR (ln)    | 0.309                  | <b>0.027</b> | 0.509                  | 0.073        | 0.518                  | <b>0.003</b> | -0.110                 | 0.700        |
| PLR (ln)    | 0.233                  | 0.100        | /                      | /            | 0.549                  | <b>0.001</b> | 0.142                  | 0.526        |

Table S8. Subgroup analysis result based on DM duration.

|             | HRF (DM duration no more than 10 years) |              |                        |              | HRF (DM duration over 10 years) |                  |                        |              |
|-------------|-----------------------------------------|--------------|------------------------|--------------|---------------------------------|------------------|------------------------|--------------|
|             | Univariable                             |              | Multivariable          |              | Univariable                     |                  | Multivariable          |              |
|             | $\beta$<br>coefficient                  | P<br>value   | $\beta$<br>coefficient | P<br>value   | $\beta$<br>coefficient          | P<br>value       | $\beta$<br>coefficient | P<br>value   |
| Age         | -0.018                                  | 0.905        | /                      | /            | 0.023                           | 0.892            | /                      | /            |
| DM Duration | /                                       | /            | /                      | /            | /                               | /                | /                      | /            |
| DR Severity | 0.468                                   | <b>0.042</b> | 0.317                  | <b>0.017</b> | 0.560                           | <b>&lt;0.001</b> | 0.357                  | <b>0.009</b> |
| BCVA        | 0.201                                   | 0.180        | /                      | /            | 0.090                           | 0.606            | /                      | /            |
| Cyst Size   | 0.296                                   | <b>0.045</b> | 0.121                  | 0.344        | -0.204                          | 0.232            | /                      | /            |
| ELM/EZ      | 0.232                                   | 0.121        | /                      | /            | 0.294                           | 0.082            | 0.148                  | 0.230        |
| DRIL        | -0.024                                  | 0.873        | /                      | /            | -0.040                          | 0.815            | /                      | /            |
| HRF         | /                                       | /            | /                      | /            | /                               | /                | /                      | /            |
| SRF         | 0.328                                   | <b>0.026</b> | 0.119                  | 0.364        | 0.511                           | <b>0.001</b>     | 0.335                  | <b>0.010</b> |
| VM          | 0.123                                   | 0.820        | /                      | /            | 0.100                           | 0.560            | /                      | /            |
| SII (ln)    | 0.451                                   | <b>0.002</b> | 0.430                  | <b>0.002</b> | 0.450                           | <b>0.006</b>     | 0.137                  | 0.542        |
| NLR (ln)    | 0.309                                   | <b>0.037</b> | -0.080                 | 0.686        | 0.526                           | <b>0.001</b>     | 0.335                  | <b>0.015</b> |
| PLR (ln)    | 0.307                                   | <b>0.038</b> | -0.080                 | 0.599        | 0.557                           | <b>&lt;0.001</b> | 0.046                  | 0.789        |

Supplementary material

Table S9. Subgroup analysis result based on ELM/EZ integrity.

|             | HRF (ELM/EZ intact) |                  |               |              | HRF (ELM/EZ disrupted) |                  |               |              | HRF (ELM/EZ absent) |              |               |              |
|-------------|---------------------|------------------|---------------|--------------|------------------------|------------------|---------------|--------------|---------------------|--------------|---------------|--------------|
|             | Univariable         |                  | Multivariable |              | Univariable            |                  | Multivariable |              | Univariable         |              | Multivariable |              |
|             | $\beta$             | P value          | $\beta$       | P value      | $\beta$                | P value          | $\beta$       | P value      | $\beta$             | P value      | $\beta$       | P value      |
| Age         | -0.022              | 0.903            | /             | /            | 0.119                  | 0.453            | /             | /            | 0.073               | 0.876        | /             | /            |
| DM Duration | 0.191               | 0.288            | /             | /            | 0.351                  | <b>0.023</b>     | 0.172         | 0.261        | 0.442               | 0.321        | /             | /            |
| DM severity | 0.613               | <b>&lt;0.001</b> | 0.454         | <b>0.003</b> | 0.523                  | <b>&lt;0.001</b> | 0.351         | <b>0.026</b> | 0.632               | 0.555        |               |              |
| BCVA        | 0.247               | 0.166            | /             | /            | 0.070                  | 0.663            | /             | /            | 0.532               | 0.219        | /             | /            |
| Cyst Size   | 0.160               | 0.374            | /             | /            | -0.247                 | 0.115            | /             | /            | 0.510               | 0.243        | /             | /            |
| ELM/EZ      | /                   | /                | /             | /            | /                      | /                | /             | /            | /                   | /            | /             | /            |
| DRIL        | /                   | /                | /             | /            | -0.181                 | 0.250            | /             | /            | -0.134              | 0.775        | /             | /            |
| HRF         | /                   | /                | /             | /            | /                      | /                | /             | /            | /                   | /            | /             | /            |
| SRF         | 0.547               | <b>0.001</b>     | 0.270         | 0.061        | 0.296                  | 0.057            | /             | /            | 0.549               | 0.202        | /             | /            |
| VM          | 0.153               | 0.397            | /             | /            | -0.210                 | 0.182            | /             | /            | 0.736               | 0.059        | /             | /            |
| SII (ln)    | 0.469               | <b>0.006</b>     | 0.404         | <b>0.007</b> | 0.398                  | <b>0.009</b>     | 0.146         | 0.428        | 0.754               | <b>0.050</b> | 0.370         | 0.237        |
| NLR (ln)    | 0.317               | 0.072            | /             | /            | 0.423                  | <b>0.005</b>     | 0.181         | 0.425        | 0.748               | 0.053        | /             | /            |
| PLR (ln)    | 0.212               | 0.235            | /             | /            | 0.496                  | <b>0.001</b>     | 0.326         | <b>0.038</b> | 0.808               | <b>0.028</b> | 0.866         | <b>0.012</b> |
